# Supplementary material for: Qili Qiangxin capsules for chronic heart failure: A GRADE-assessed clinical evidence and preclinical mechanism
Source: Front Cardiovasc Med. 2023 Jan 11;9:1090616. doi: 10.3389/fcvm.2022.1090616 (PMC9873992; doi:10.3389/fcvm.2022.1090616)
Supplement: Supplementary file 1 [file Table_1.DOC]

**Supplementary Table 1. Formulations and chemical**

| **Study** | **Source** | **Species and usage** | **Quality control** | **Main active components of the QLQX (oral bioavailability ≥ 30% and drug-likeness ≥ 0.18)*** |
| --- | --- | --- | --- | --- |
| Qian Y H 2014 | Shijiazhuang Yiling Pharmaceutical Co., LTD. | Specification: 0.3 g | National medicine permission number: Z20040141 | **(1) (Huangqi) Astragali Radix:** isoflavanone, 7-O-methylisomucronulatol, formononetin, FA, (3R)-3-(2-hydroxy-3,4-dimethoxyphenyl)chroman-7-ol, (6aR,11aR)-9,10-dimethoxy-6a,11a-dihydro-6H-benzofurano[3,2-c]chromen-3-ol, Mairin, 3,9-di-O-methylnissolin, Jaranol, isorhamnetin, isomucronulatol-7,2'-di-O-glucosiole, Calycosin, quercetin, kaempferol, 5'-hydroxyiso-muronulatol-2',5'-di-O-glucoside, 1,7-Dihydroxy-3,9-dimethoxy pterocarpene, hederagenin, 9,10-dimethoxypterocarpan-3-O-β-D-glucoside, (3S,8S,9S,10R,13R,14S,17R)-10,13-dimethyl-17-[(2R,5S)-5-propan-2-yloctan-2-yl]-2,3,4,7,8,9,11,12,14,15,16,17-dodecahydro-1H-cyclopenta[a]phenanthren-3-ol, Bifendate  **(2) (Renshen) Ginseng Radix et Rhizoma:** Celabenzine, Aposiopolamine, Frutinone A, Inermin, Girinimbin, Fumarine, malkangunin, suchilactone, arachidonate, Stigmasterol, Diop, kaempferol, Dianthramine, ginsenoside Rg5_qt, Deoxyharringtonine, Chrysanthemaxanthin, beta-sitosterol, alexandrin_qt, ginsenoside rh2, Panaxadiol, Gomisin B, Ginsenoside-Rh4_qt  **(3) (Fuzi) Aconiti Lateralis Radix Preparata:** deoxyaconitine, hypaconitine, jesaconitine, benzoylnapelline, Demethyldelavaine A, Demethyldelavaine B, sitosterol, Carnosifloside I_qt, 2,7-Dideacetyl-2,7-dibenzoyl-taxayunnanine F, 11,14-eicosadienoic acid, (3R,8S,9R,10R,13R,14S,17R)-3-hydroxy-4,4,9,13,14-pentamethyl-17-[(E,2R)-6-methyl-7-[(2R,3R,4S,5S,6R)-3,4,5-trihydroxy-6-[[(2R,3R,4S,5S,6R)-3,4,5-trihydroxy-6-(hydroxymethyl)oxan-2-yl]oxymethyl]oxan-2-yl]oxyhept-5-en-2-yl]-1,2,3,7,8,10,12,15,16,17-decahydr, Neokadsuranic acid B, Deltoin, isotalatizidine, karakoline, 6-Demethyldesoline, Deoxyandrographolide, Delphin_qt, Karanjin, (R)-Norcoclaurine, ignavine  **(4) (Danshen) Salvia Miltiorrhiza Radix et Rhizoma:** Salvilenone, salviolone, 3-beta-Hydroxymethyllenetanshiquinone, salvilenone Ⅰ, 5,6-dihydroxy-7-isopropyl-1,1-dimethyl-2,3-dihydrophenanthren-4-one, 4-methylenemiltirone, NSC 122421, 1-methyl-8,9-dihydro-7H-naphtho[5,6-g]benzofuran-6,10,11-trione, C09092, sugiol, luteolin, miltipolone, poriferast-5-en-3beta-ol, Methylenetanshinquinone, przewalskin a, dihydrotanshinlactone, 1,2,5,6-tetrahydrotanshinone, Miltirone, dan-shexinkum d, neocryptotanshinone ii, α-amyrin, microstegiol, Baicalin, przewaquinone f, 2-isopropyl-8-methylphenanthrene-3,4-dione, (6S,7R)-6,7-dihydroxy-1,6-dimethyl-8,9-dihydro-7H-naphtho[8,7-g]benzofuran-10,11-dione, Tanshindiol B, Przewaquinone E, salvianolic acid j, sclareol, Dehydrotanshinone II A, Poriferasterol, 3α-hydroxytanshinoneⅡa, miltirone Ⅱ, dihydrotanshinoneⅠ, manool, isoimperatorin, salvianolic acid g, tanshinone Ⅵ, 6-o-syringyl-8-o-acetyl shanzhiside methyl ester, (E)-3-[2-(3,4-dihydroxyphenyl)-7-hydroxy-benzofuran-4-yl]acrylic acid, deoxyneocryptotanshinone, miltionone Ⅰ, tanshinone iia, Isotanshinone II, danshenspiroketallactone, cryptotanshinone, tanshinaldehyde, neocryptotanshinone, isocryptotanshi-none, przewaquinone c, Danshenol A, Danshenol B, digallate, Przewaquinone B, 2-(4-hydroxy-3-methoxyphenyl)-5-(3-hydroxypropyl)-7-methoxy-3-benzofurancarboxaldehyde, prolithospermic acid, (6S)-6-(hydroxymethyl)-1,6-dimethyl-8,9-dihydro-7H-naphtho[8,7-g]benzofuran-10,11-dione, epidanshenspiroketallactone, miltionone Ⅱ, formyltanshinone, (6S)-6-hydroxy-1-methyl-6-methylol-8,9-dihydro-7H-naphtho[8,7-g]benzofuran-10,11-quinone, (Z)-3-[2-[(E)-2-(3,4-dihydroxyphenyl)vinyl]-3,4-dihydroxy-phenyl]acrylic acid, (2R)-3-(3,4-dihydroxyphenyl)-2-[(Z)-3-(3,4-dihydroxyphenyl)acryloyl]oxy-propionic acid, przewalskin b  **(5) (Tinglizi) Descurainiae Semen Lepidii Semen:** 11,14-eicosadienoic acid, Dihomolinolenic acid, K-STROPHANTHOSIDE, erysimoside, kaempferol, evobioside, quercetin, isorhamnetin, hederagenin, beta-sitosterol, K-STROPHANTHOSIDE_qt, Cynotoxin  **(6) (Zexie) Alismatis Rhizoma:** 16β-methoxyalisol B monoacetate, alisol,b,23-acetate, alisol C, alisol C monoacetate, Alisol B, Alisol B monoacetate, [(1S,3R)-1-[(2R)-3,3-dimethyloxiran-2-yl]-3-[(5R,8S,9S,10S,11S,14R)-11-hydroxy-4,4,8,10,14-pentamethyl-3-oxo-1,2,5,6,7,9,11,12,15,16-decahydrocyclopenta[a]phenanthren-17-yl]butyl] acetate, alisol B, sitosterol, 1-Monolinolein  **(7) (Yuzhu) Polygonati Odorati Rhizoma:** 3-o-beta-d-glucopyranosyl-(1-2)-[beta-d-xylopyranosyl-(1-3)]-beta-d-glucopyranosyl-(1-4)-galactopyranosyl-25(S)-spirost-5(6)-en-3beta,14alpho-diol_qt, 4',5,7-trihydroxy-6-methyl-8-methoxy-homoisoflavanone, 4',5,7-trihydroxy-6,8-dimethyl-homoisoflavanone, polygosides E_qt, 4',5,7-trihydroxy-6-methyl-homoisoflavanone, 4'-methoxy-5,7-dihydroxy-6,8-dimethyl-homoisflavanone, n-coumaroyltyramine, (Z)-3-(4-hydroxy-3-methoxy-phenyl)-N-[2-(4-hydroxyphenyl)ethyl]acrylamide  **(8) (Guizhi) Cinnamomi Ramulus:** sitosterol, beta-sitosterol, Peroxyergosterol, ent-Epicatechin, (+)-catechin, taxifolin, (-)-taxifolin  **(9) (Honghua) Carthami Flos:** poriferast-5-en-3beta-ol, Flavoxanthin, 4-[(E)-4-(3,5-dimethoxy-4-oxo-1-cyclohexa-2,5-dienylidene)but-2-enylidene]-2,6-dimethoxycyclohexa-2,5-dien-1-one, lignan, lupeol-palmitate, Phytoene, phytofluene, Pyrethrin II, 6-Hydroxykaempferol, baicalein, qt_carthamone, 6-Hydroxynaringenin, quercetagetin, 7,8-dimethyl-1H-pyrimido[5,6-g]quinoxaline-2,4-dione, beta-carotene, Baicalin, beta-sitosterol, kaempferol, Stigmasterol, luteolin, CLR, quercetin  **(10) (Xiangjiapi) Periplocae Cortex:** poriferast-5-en-3beta-ol, beta-sitosterol, sitosterol, 21-O-Methyl-5,14-pregndiene-3β,14β,17β,21-tetrol-20-one, 21-O-Methyl-5-pregnene-3beta,14beta,17beta,20,21-pentol, Glycoside K_qt, Glycoside H2_qt, Glycozolidal, Periplogenin, glycoside E_qt, Periplocoside M_qt, periplocoside E_qt, delta 5-Pregnenetriol, periplocoside O_qt, periplocymarin_qt, NERIDIENONE A, xysmalogenin  **(11) (Chenpi) Citri Reticulatae Pericarpium:** sitosterol, naringenin, 5,7-dihydroxy-2-(3-hydroxy-4-methoxyphenyl)chroman-4-one, Citromitin, nobiletin |
| Yu C Q 2012 | Shijiazhuang Yiling Pharmaceutical Co., LTD. | Specification: 0.3 g, Each gram of powder is equivalent to 6.325 g of raw medicine | National medicine permission number: Z20040141, batch No. 100208 |
| Liu C H 2020 | Shijiazhuang Yiling Pharmaceutical Co., LTD. | Specification: 0.3 g | National medicine permission number: Z20040141, batch number: A1511014 |
| Xu T 2010 | Shijiazhuang Yiling Pharmaceutical Co., LTD. | Specification: 0.3 g | National medicine permission number: Z20040141, batch number: 081003 |
| Li Y 2016 | Shijiazhuang Yiling Pharmaceutical Co., LTD. | Specification: 0.3 g; 0.6 g/kg was dissolved in 3 ml distilled water | National medicine permission number: Z20040141 |
| Lin R B 2010 | Shijiazhuang Yiling Pharmaceutical Co., LTD. | Specification: 0.3 g | National medicine permission number: Z20040141 |
| Cui X N 2015 | Shijiazhuang Yiling Pharmaceutical Co., LTD. | Specification: 0.3 g; 0.1 g/mL | National medicine permission number: Z20040141 |
| Li X L 2013 | Shijiazhuang Yiling Pharmaceutical Co., LTD. | Specification: 0.3 g; 4 capsules per time, 3 times per day | National medicine permission number: Z20040141 |
| Liu D G 2016 | Shijiazhuang Yiling Pharmaceutical Co., LTD. | Specification: 0.3 g; 4 capsules per time, 3 times per day | National medicine permission number: Z20040141 |
| Liu H 2021 | Shijiazhuang Yiling Pharmaceutical Co., LTD. | Specification: 0.3 g; 4 capsules per time, 3 times per day | National medicine permission number: Z20040141 |
| Huang Y K 2012 | Shijiazhuang Yiling Pharmaceutical Co., LTD. | Specification: 0.3 g; 3 capsules per time, 3 times per day | National medicine permission number: Z20040141 |
| Du C C 2009 | NR | 4 capsules per time, 3 times per day | NR |
| Guo L F 2015 | Shijiazhuang Yiling Pharmaceutical Co., LTD. | Specification: 0.3 g; 4 capsules per time, 3 times per day | National medicine permission number: Z20040141 |
| Wang D 2017 | NR | 4 capsules per time, 3 times per day | NR |
| Ding M 2009 | Shijiazhuang Yiling Pharmaceutical Co., LTD. | 4 capsules per time, 3 times per day | NR |
| Gao Q Y 2017 | NR | Specification: 0.3 g; 4 capsules per time, 3 times per day | NR |
| Kong X H 2015 | Shijiazhuang Yiling Pharmaceutical Co., LTD. | 4 capsules per time, 3 times per day | National medicine permission number: Z20040141 |
| Li B 2018 | Shijiazhuang Yiling Pharmaceutical Co., LTD. | Specification: 0.3 g; 4 capsules per time, 3 times per day | National medicine permission number: Z20040141 |
| Yao J F 2022 | Shijiazhuang Yiling Pharmaceutical Co., LTD. | Specification: 0.3 g; 4 capsules per time, 3 times per day | National medicine permission number: Z20040141 |
| Dong Y 2020 | NR | 1.2 g per time, 3 times per day | NR |
| Li T W 2021 | Shijiazhuang Yiling Pharmaceutical Co., LTD. | Specification: 0.3 g; 4 capsules per time, 3 times per day | NR |
| Yang W B 2021 | NR | 1.2 g per time, 3 times per day | National medicine permission number: Z20040141 |
| Li C Y 2020 | Shijiazhuang Yiling Pharmaceutical Co., LTD. | Specification: 0.3 g; 4 capsules per time, 3 times per day | NR |
| Han G Z 2020 | NR | Specification: 0.3 g; 4 capsules per time, 3 times per day | National medicine permission number: Z20040141 |
| Lu C 2020 | Shijiazhuang Yiling Pharmaceutical Co., LTD. | Specification: 0.3 g; 4 capsules per time, 3 times per day | Batch number: 161211, 181105 |
| Liu L 2019 | Shijiazhuang Yiling Pharmaceutical Co., LTD. | 1,2 g per time, 3 times per day | National medicine permission number: Z20040141 |
| Liu Y 2019 | Shijiazhuang Yiling Pharmaceutical Co., LTD. | Specification: 0.3 g; 4 capsules per time, 3 times per day | National medicine permission number: Z20040141 |
| Nie Z M 2021 | Shijiazhuang Yiling Pharmaceutical Co., LTD. | 1,2 g per time, 3 times per day | National medicine permission number: Z20040141 |
| Liu Y C 2021 | Shijiazhuang Yiling Pharmaceutical Co., LTD. | Specification: 0.3 g; 4 capsules per time, 3 times per day | National medicine permission number: Z20040141 |
| Wang Y Z 2022 | Shijiazhuang Yiling Pharmaceutical Co., LTD. | Specification: 0.3 g; 4 capsules per time, 3 times per day | National medicine permission number: Z20040141 |
| Sun C J 2021 | Shijiazhuang Yiling Pharmaceutical Co., LTD. | Specification: 0.3 g; 4 capsules per time, 3 times per day | National medicine permission number: Z20040141 |
| Wang Z X 2016 | NR | Specification: 0.3 g; 4 capsules per time, 3 times per day | NR |

Note: NR, not reported; *, High oral bioavailability is a key indicator to determine the drug-likeness properties of bioactive molecules as therapeutic agents, and a drug-likeness level of 0.18 for compounds can be used as a screening criterion for herbal medicine.

**Supplementary Table 2. PRISMA Statement**

| **Section/topic** | **#** | **Checklist item** | **Reported on page #** |
| --- | --- | --- | --- |
| **TITLE** | | |  |
| Title | 1 | Identify the report as a systematic review, meta-analysis, or both. | Both |
| **ABSTRACT** | | |  |
| Structured summary | 2 | Provide a structured summary including, as applicable: background; objectives; data sources; study eligibility criteria, participants, and interventions; study appraisal and synthesis methods; results; limitations; conclusions and implications of key findings; systematic review registration number. | 2 |
| **INTRODUCTION** | | |  |
| Rationale | 3 | Describe the rationale for the review in the context of what is already known. | 2, 3 |
| Objectives | 4 | Provide an explicit statement of questions being addressed with reference to participants, interventions, comparisons, outcomes, and study design (PICOS). | 2, 3 |
| **METHODS** | | |  |
| Protocol and registration | 5 | Indicate if a review protocol exists, if and where it can be accessed (e.g., Web address), and, if available, provide registration information including registration number. | 3 |
| Eligibility criteria | 6 | Specify study characteristics (e.g., PICOS, length of follow-up) and report characteristics (e.g., years considered, language, publication status) used as criteria for eligibility, giving rationale. | 3 |
| Information sources | 7 | Describe all information sources (e.g., databases with dates of coverage, contact with study authors to identify additional studies) in the search and date last searched. | 3 |
| Search | 8 | Present full electronic search strategy for at least one database, including any limits used, such that it could be repeated. | 3 |
| Study selection | 9 | State the process for selecting studies (i.e., screening, eligibility, included in systematic review, and, if applicable, included in the meta-analysis). | 3 |
| Data collection process | 10 | Describe method of data extraction from reports (e.g., piloted forms, independently, in duplicate) and any processes for obtaining and confirming data from investigators. | 4 |
| Data items | 11 | List and define all variables for which data were sought (e.g., PICOS, funding sources) and any assumptions and simplifications made. | 4 |
| Risk of bias in individual studies | 12 | Describe methods used for assessing risk of bias of individual studies (including specification of whether this was done at the study or outcome level), and how this information is to be used in any data synthesis. | 4 |
| Summary measures | 13 | State the principal summary measures (e.g., risk ratio, difference in means). | 4 |
| Synthesis of results | 14 | Describe the methods of handling data and combining results of studies, if done, including measures of consistency (e.g., I2) for each meta-analysis. | 4 |

Page 1 of 2

| **Section/topic** | **#** | **Checklist item** | **Reported on page #** |
| --- | --- | --- | --- |
| Risk of bias across studies | 15 | Specify any assessment of risk of bias that may affect the cumulative evidence (e.g., publication bias, selective reporting within studies). | 4 |
| Additional analyses | 16 | Describe methods of additional analyses (e.g., sensitivity or subgroup analyses, meta-regression), if done, indicating which were pre-specified. | 4 |
| **RESULTS** | | |  |
| Study selection | 17 | Give numbers of studies screened, assessed for eligibility, and included in the review, with reasons for exclusions at each stage, ideally with a flow diagram. | 4, 5 |
| Study characteristics | 18 | For each study, present characteristics for which data were extracted (e.g., study size, PICOS, follow-up period) and provide the citations. | 5, 6 |
| Risk of bias within studies | 19 | Present data on risk of bias of each study and, if available, any outcome level assessment (see item 12). | 6 |
| Results of individual studies | 20 | For all outcomes considered (benefits or harms), present, for each study: (a) simple summary data for each intervention group (b) effect estimates and confidence intervals, ideally with a forest plot. | 6-10 |
| Synthesis of results | 21 | Present results of each meta-analysis done, including confidence intervals and measures of consistency. | 6-10 |
| Risk of bias across studies | 22 | Present results of any assessment of risk of bias across studies (see Item 15). | 6-10 |
| Additional analysis | 23 | Give results of additional analyses, if done (e.g., sensitivity or subgroup analyses, meta-regression [see Item 16]). | 6-10 |
| **DISCUSSION** | | |  |
| Summary of evidence | 24 | Summarize the main findings including the strength of evidence for each main outcome; consider their relevance to key groups (e.g., healthcare providers, users, and policy makers). | 10-11 |
| Limitations | 25 | Discuss limitations at study and outcome level (e.g., risk of bias), and at review-level (e.g., incomplete retrieval of identified research, reporting bias). | 11 |
| Conclusions | 26 | Provide a general interpretation of the results in the context of other evidence, and implications for future research. | 12 |
| **FUNDING** | | |  |
| Funding | 27 | Describe sources of funding for the systematic review and other support (e.g., supply of data); role of funders for the systematic review. | 12 |

*From:*  Moher D, Liberati A, Tetzlaff J, Altman DG, The PRISMA Group (2009). Preferred Reporting Items for Systematic Reviews and Meta-Analyses: The PRISMA Statement. PLoS Med 6(7): e1000097. doi:10.1371/journal.pmed1000097

For more information, visit: **www.prisma-statement.org**.

Page 2 of 2

**Supplementary Table 3. The search strategy of the PubMed database**

| **Number** | **Keywords of the Research** |
| --- | --- |
| #1 | Chronic heart failure[mh] |
| **#2** | Heart failure*[tiab] OR Chronic heart failure[tiab] |
| **#3** | OR/#1-#2 |
| **#4** | Qili Qiangxin capsule[mh] |
| **#5** | Qili Qiangxin*[tiab] OR Qili Qiangxin capsule[tiab] OR Qiliqiangxin[tiab] OR QQC[tiab] OR QLQX[tiab] |
| **#6** | OR/#4-#5 |
| **#7** | #3 AND #6 |

Note: mh: MeSH; tiab: tittle/abstrac

**Supplementary Table 4. Risk of bias judgments for preclinical experiments (SYRCLE)**

| **ID** | **Sequence generation** | **Baseline characteristics** | **Allocation concealment** | **Random housing** | **Blinding of performance** | **Random outcome assessment** | **Blinding of detection** | **Incomplete outcome data** | **Selective outcome reporting** | **Other sources of bias** |
| --- | --- | --- | --- | --- | --- | --- | --- | --- | --- | --- |
| Qian Y H 2014 | Low | Some concerns | Low | Some concerns | Some concerns | Some concerns | Low | Some concerns | Low | Some concerns |
| Yu C Q 2012 | Low | Some concerns | Low | Some concerns | Some concerns | Low | Low | Low | Some concerns | Low |
| Liu C H 2020 | Some concerns | Low | Some concerns | Some concerns | Some concerns | Some concerns | Low | Low | Low | Low |
| Xu T 2010 | Low | Low | Some concerns | Some concerns | Low | Some concerns | Low | Low | Low | Some concerns |
| Li Y 2016 | Some concerns | Low | Some concerns | Some concerns | Some concerns | Some concerns | Low | Low | Low | Some concerns |
| Lin R B 2010 | Low | Low | Some concerns | Some concerns | Some concerns | Low | Low | Low | Low | Low |
| Cui X N 2015 | Some concerns | Low | Some concerns | Some concerns | Some concerns | Low | Low | Low | Low | Low |

**Supplementary Table 5. Risk of bias judgments for randomized controlled trials (RoB 2.0)**

| **ID** | **Bias arising from the randomization process** | **Bias due to deviations from intended intervention** | **Bias due to missing outcome data** | **Bias in measurement of the outcome** | **Bias in selection of the reported result** | **Overall** |
| --- | --- | --- | --- | --- | --- | --- |
| **Li X L 2013** | Low | Low | Low | Low | Low | Low |
| **Liu D G 2016** | Low | Low | Low | Some concerns | Some concerns | Some concerns |
| **Liu H 2021** | Low | Low | Low | Low | Some concerns | Some concerns |
| **Huang Y K 2012** | Low | Low | Low | Some concerns | Some concerns | Some concerns |
| **Du C C 2009** | Low | Low | Some concerns | Some concerns | Some concerns | Some concerns |
| **Guo L F 2015** | Low | Low | Low | Some concerns | Some concerns | Some concerns |
| **Wang D 2017** | Low | Low | Some concerns | High | Low | High |
| **Ding M 2009** | Low | Low | Low | Low | Low | Low |
| **Gao Q Y 2017** | Low | Low | Low | Low | Low | Low |
| **Kong X H 2015** | Low | Low | Low | Some concerns | Low | Some concerns |
| **Li B 2018** | Low | Low | Low | Low | Low | Low |
| **Yao J F 2022** | Low | Low | Low | Low | Low | Low |
| **Dong Y 2020** | Low | Low | Low | Low | Low | Low |
| **Li T W 2021** | Low | Low | Low | High | Some concerns | High |
| **Yang W B 2021** | Low | Low | Low | Low | Some concerns | Some concerns |
| **Li C Y 2020** | Low | Low | Low | Some concerns | Some concerns | Some concerns |
| **Han G Z 2020** | Low | Low | Low | Some concerns | Some concerns | Some concerns |
| **Lu C 2020** | Low | Low | Low | Low | Low | Low |
| **Liu L 2019** | Low | Low | Low | Some concerns | Some concerns | Some concerns |
| **Liu Y 2019** | Low | Low | Low | Some concerns | Some concerns | Some concerns |
| **Nie Z M 2021** | Low | Low | Low | High | Some concerns | High |
| **Liu Y C 2021** | Low | Low | Some concerns | Some concerns | Some concerns | Some concerns |
| **Wang Y Z 2022** | Low | Low | Low | Some concerns | Some concerns | Some concerns |
| **Sun C J 2021** | Low | Low | Low | Some concerns | Some concerns | Some concerns |
| **Wang Z X 2016** | Low | Low | Low | Some concerns | Some concerns | Some concerns |
